# Supplementary material for: Historical Trends and Controlling Factors of Isoprene Emissions in CMIP6 Earth System Models
Source: Copernicus journal article supplement (doi:10.5194/egusphere-2024-2313), 2024-10-09
Supplement: Supplementary file 1 [file egusphere-2024-2313-supplement.pdf]

1 *Supplement of*

2 **Historical Trends and Controlling Factors of Isoprene Emissions in**  
3 **CMIP6 Earth System Models**

4 Thi Nhu Ngoc Do<sup>1</sup>, Kengo Sudo<sup>1,3</sup>, Akihiko Ito<sup>2,3,4</sup>, Louisa Emmons<sup>5</sup>, Vaishali Naik<sup>6</sup>, Kostas  
5 Tsigaridis<sup>7,8</sup>, Øyvind Seland<sup>9</sup>, Gerd A Folberth<sup>10</sup>, Douglas I Kelley<sup>11</sup>

6 <sup>1</sup>Graduate School of Environment Studies, Nagoya University, Nagoya, 464-8601, Japan

7 <sup>2</sup>Graduate School of Life and Agricultural Sciences, The University of Tokyo, Tokyo, 113-8657, Japan

8 <sup>3</sup>Japan Agency for Marine-Earth Science and Technology (JAMSTEC), Yokohama, 237-0061, Japan

9 <sup>4</sup>National Institute for Environmental Studies (NIES), Tsukuba, Ibaraki, 305-8506, Japan

10 <sup>5</sup>Atmospheric Chemistry Observations and Modeling Lab., National Center for Atmospheric Research, Boulder, CO, USA

11 <sup>6</sup>NOAA/OAR Geophysical Fluid Dynamics Laboratory, Princeton, NJ, USA

12 <sup>7</sup>Center for Climate Systems Research, Columbia University, 2880 Broadway, New York, 10025 NY, USA

13 <sup>8</sup>NASA Goddard Institute for Space Studies, 2880 Broadway, New York, 10025 NY, USA

14 <sup>9</sup>Norwegian Meteorological Institute, Oslo, Norway

15 <sup>10</sup>UK Met Office Hadley Centre, Exeter, UK

16 <sup>11</sup>UK Centre for Ecology & Hydrology, Wallingford, Oxfordshire, OX10 8BB, UK

17 *Correspondence to:* Thi Nhu Ngoc Do (ngocdtn19@gmail.com)

Table S1. Descriptions of symbols and parameters in isoprene emission schemes

| Model (Scheme)                     | $\gamma_{TMP}$                                                                                                                                    | $\gamma_{PPFD}$                                              | $\gamma_A$                                                                                                                                                                                | $\gamma_{SM}$                                                                                                                                                                                                                             | $\gamma_{CO_2\_inhi}$                                                                                                                                                             | $\gamma_{CE}$                                  |
|------------------------------------|---------------------------------------------------------------------------------------------------------------------------------------------------|--------------------------------------------------------------|-------------------------------------------------------------------------------------------------------------------------------------------------------------------------------------------|-------------------------------------------------------------------------------------------------------------------------------------------------------------------------------------------------------------------------------------------|-----------------------------------------------------------------------------------------------------------------------------------------------------------------------------------|------------------------------------------------|
| CESM2-WACCM/<br>NorESM2-LM (G2012) |                                                                                                                                                   |                                                              |                                                                                                                                                                                           | $\gamma_{SM} = 1 (\theta > \theta_1)$<br>$\gamma_{SM} = \frac{\theta - \theta_w}{\Delta\theta_1} (\theta_w < \theta < \theta_1)$<br>$\gamma_{SM} = 0 (\theta < \theta_w)$<br>Note: $\gamma_{SM} = 1$ for CESM2-WACCM(G2012) in this study | $C_{CO_2} < 365 \text{ ppm: } \gamma_{CO_2\_inhi} = 1$<br>$C_{CO_2} \geq 365 \text{ ppm:}$<br>$\gamma_{CO_2\_inhi} = I_{Smax} - \frac{I_{Smax} \cdot (C_i)^h}{(C^*)^h + (C_i)^h}$ | 0.57                                           |
| GFDL-ESM4 (G2006)                  | $E_{opt} \cdot \frac{C_{T2} \cdot \exp \exp(C_{T1}) \times (C_{T2} - C_{T1} (1 - \exp \exp(C_{T2}x)))}{C_{T2} - C_{T1} (1 - \exp \exp(C_{T2}x))}$ | $C_p \cdot \frac{\alpha PPF D}{\sqrt{1 + \alpha^2 PPF D^2}}$ | $F_{new}A_{new} + F_{grow}A_{grow} + F_{mat}A_{mat} + F_{old}A_{old}$                                                                                                                     | -                                                                                                                                                                                                                                         | -                                                                                                                                                                                 | $\frac{0.49 LAI_C}{[(1 + 0.2 LAI_C^2)^{0.5}]}$ |
| VISIT(G1997)                       | $\frac{\exp(\frac{C_{T1}(T_1 - T_s)}{RT_s T_1})}{0.961 + \exp(\frac{C_{T2}(T_1 - T_M)}{RT_s T_1})}$                                               | $\frac{\alpha_1 c_L Q}{\sqrt{1 + \alpha_1^2 Q^2}}$           | 1) Evergreen:<br>$\gamma_A = 0.05$ (leaf age < 1 month) ~ 1.2<br>(3 < leaf age < 24 months)<br>2) Deciduous<br>$\gamma_A = 0.05$ (leaf age < 1 month) ~ 1.2<br>(2 < leaf age < 10 months) | -                                                                                                                                                                                                                                         | -                                                                                                                                                                                 | 0.5                                            |
| GISS-E2.1-G (G1995)                | $\frac{\exp(\frac{C_{T1}(T_1 - T_s)}{RT_s T_1})}{1 + \exp(\frac{C_{T2}(T_1 - T_M)}{RT_s T_1})}$                                                   | $\frac{\alpha_1 c_L Q}{\sqrt{1 + \alpha_1^2 Q^2}}$           | -                                                                                                                                                                                         | -                                                                                                                                                                                                                                         | -                                                                                                                                                                                 | -                                              |
| UKESM1-0-LL (P2011)                | $(e^{0.1(T_a - T_{st})}; 2.3)$                                                                                                                    | $\frac{A_j + R_D}{(A_j)_{st} + (R_D)_{st}}$                  | -                                                                                                                                                                                         | -                                                                                                                                                                                                                                         | $\frac{C_{i\_st}}{C_i}$                                                                                                                                                           | -                                              |

$E_{opt}$ : the maximum normalized emission capacity ( $\text{mol km}^{-2} \text{h}^{-1}$ )

$x$ : Function of leaf temperature

$C_{T1}$ ,  $C_{T2}$ : empirical coefficient (95, 230)

$c_{T1}$ ,  $c_{T2}$ : empirical coefficient; 95000, 230000  $\text{J mol}^{-1}$ )

$T_M$ : empirical coefficient (314 K)

R: Constant ( $8.314 \text{ J K}^{-1} \text{ mol}^{-1}$ )

$T_a$ : air temperature

$T_{st}$ : temperature at a standard condition (303.15 K)

$C_p$ : function related to past PPFD

$\alpha$ : empirical coefficients associated with past PPFD

PPFD: instantaneous photosynthesis photo flux density

$\alpha_1$ ,  $c_l$ : empirical coefficient (0.0027, 1.066)

Q: flux of PAR ( $\mu\text{mol m}^{-2} \text{ s}^{-1}$ )

$A_j$ : leaf level net photosynthesis when RuBP is limiting

$R_D$ : Leaf level dark respiration

“st” indicates that the variables are measured at standard conditions

Fraction for four growth stages: new foliage ( $F_{new}$ ), growing foliage ( $F_{grow}$ ), mature foliage ( $F_{mat}$ ), and old foliage ( $F_{old}$ ).

$A_{new}$ ,  $A_{grow}$ ,  $A_{mat}$ , and  $A_{old}$  are the relative emission rates assigned to each canopy fraction depending on PFTs.

The only update of equation parameters from G2006 is the relative emission rates assigned to each compound class in G2012.

$\theta$ : soil moisture ( $\text{m}^3 \text{ m}^{-3}$ )

$\theta_w$ : soil moisture threshold below which plants cannot extract water from soil (wilting point,  $\text{m}^3 \text{ m}^{-3}$ )

$\Delta\theta_1$  (=0.06): parameter from Pegoraro et al. (2004) for G2006 and  $\Delta\theta_1$  (=0.04) for G2012.

$I_{Smax}$ : empirically coefficient (1.344)

$C_l$ : Leaf internal  $\text{CO}_2$  concentration, which is estimated as 70% of the ambient  $\text{CO}_2$  concentration ( $C_{CO_2}$ )

$C^*$ : empirically coefficient (585)

$h$ : empirically coefficient (1.4614)

$C_{l, st}$ : Leaf internal  $\text{CO}_2$  concentration at standard conditions

19

**Table S2. Summary of emulated sensitivity simulations using random forest regressors for CESM2-WACCM(G2012), NorESM2-LM(G2012) and UKESM1-0-LL(P2011)**

| Simulation No. | CO <sub>2</sub> conc. | LULCC         | Climate       |                       |               |
|----------------|-----------------------|---------------|---------------|-----------------------|---------------|
|                |                       |               | Temperature   | Shortwave radiation   | Precipitation |
| S0             | Fixed in 1850         | Fixed in 1850 |               |                       |               |
| S1             | -                     | Fixed in 1850 |               | Climate fixed in 1850 |               |
| S2             | -                     | Fixed in 1850 |               | -                     |               |
| S3             | -                     | -             |               | -                     |               |
| S4             | -                     | -             | Fixed in 1850 | -                     | -             |
| S5             | -                     | -             | -             | Fixed in 1850         | -             |
| S6             | -                     | -             | -             | -                     | Fixed in 1850 |

“-” denotes the variable that varied annually during the simulation period.

**Table S3. Summary of emulated sensitivity simulations using random forest regressors for GFDL-ESM4(G2006) and GISS-E2.1-G(G1995)**

| Simulation No. | LULCC         | Climate       |                       |               |
|----------------|---------------|---------------|-----------------------|---------------|
|                |               | Temperature   | Shortwave radiation   | Precipitation |
| S1'            | Fixed in 1850 |               | Climate fixed in 1850 |               |
| S2'            | Fixed in 1850 |               | -                     |               |
| S3'            | -             |               | -                     |               |
| S4             | -             | Fixed in 1850 | -                     | -             |
| S5             | -             | -             | Fixed in 1850         | -             |
| S6             | -             | -             | -                     | Fixed in 1850 |

“-” denotes the variable that varied annually during the simulation period.

Table S4. Mean annual global and regional isoprene emissions (TgC yr<sup>-1</sup>) in the present day (2000–2014)

| Region                      | Abbr. | CESM2-<br>WACCM<br>(G2012) | NorESM2<br>-LM<br>(G2012) | GFDL-<br>ESM4<br>(G2006) | GISS-<br>E2.1-G<br>(G1995) | UKESM1-<br>0-LL<br>(P2011) | VISIT-S3<br>(G1997) | Ensemble<br>mean | Inter-<br>model<br>spreads | Relative<br>inter-<br>model<br>spreads<br>(%) |
|-----------------------------|-------|----------------------------|---------------------------|--------------------------|----------------------------|----------------------------|---------------------|------------------|----------------------------|-----------------------------------------------|
| Alaska/N.W.Canada           | ALA   | 0.44                       | 0.29                      | 0.38                     | 1.54                       | 1.10                       | 1.39                | 0.85             | 0.51                       | 59%                                           |
| Canada/<br>Greenl./Icel.    | CGI   | 0.61                       | 0.62                      | 1.12                     | 2.73                       | 2.55                       | 2.20                | 1.64             | 0.88                       | 54%                                           |
| W. North America            | WNA   | 1.83                       | 1.85                      | 2.17                     | 8.34                       | 9.34                       | 3.32                | 4.48             | 3.14                       | 70%                                           |
| C. North America            | CNA   | 3.04                       | 3.57                      | 9.46                     | 18.07                      | 10.83                      | 5.72                | 8.45             | 5.16                       | 61%                                           |
| E. North America            | ENA   | 5.41                       | 5.40                      | 5.05                     | 6.66                       | 5.82                       | 5.26                | 5.60             | 0.53                       | 9%                                            |
| Central America/<br>Mexico  | CAM   | 18.49                      | 22.84                     | 22.39                    | 12.15                      | 13.94                      | 26.59               | 19.40            | 5.09                       | 26%                                           |
| Amazon                      | AMZ   | 175.13                     | 175.74                    | 107.26                   | 98.98                      | 116.55                     | 132.90              | 134.43           | 30.77                      | 23%                                           |
| N.E. Brazil                 | NEB   | 13.22                      | 8.65                      | 19.94                    | 19.61                      | 27.67                      | 30.86               | 19.99            | 7.66                       | 38%                                           |
| Coast South<br>America      | WSA   | 4.97                       | 6.41                      | 2.91                     | 2.45                       | 7.34                       | 5.33                | 4.90             | 1.75                       | 36%                                           |
| S.E. South America          | SSA   | 12.29                      | 10.97                     | 18.22                    | 23.51                      | 22.25                      | 16.82               | 17.34            | 4.64                       | 27%                                           |
| N. Europe                   | NEU   | 0.51                       | 0.39                      | 0.77                     | 1.32                       | 1.04                       | 1.80                | 0.97             | 0.48                       | 50%                                           |
| C. Europe                   | CEU   | 1.59                       | 1.55                      | 5.03                     | 6.16                       | 2.63                       | 3.23                | 3.36             | 1.71                       | 51%                                           |
| S. Europe/<br>Mediterranean | MED   | 1.40                       | 1.07                      | 5.12                     | 2.53                       | 3.66                       | 4.62                | 3.07             | 1.53                       | 50%                                           |
| Sahara                      | SAH   | 0.10                       | 0.08                      | 0.34                     | 24.89                      | 0.16                       | 0.47                | 4.34             | 9.19                       | 212%                                          |
| W. Africa                   | WAF   | 58.40                      | 58.86                     | 45.53                    | 56.15                      | 59.83                      | 68.61               | 57.90            | 6.78                       | 12%                                           |
| E. Africa                   | EAF   | 17.04                      | 14.57                     | 20.01                    | 37.82                      | 32.61                      | 32.24               | 25.71            | 8.84                       | 34%                                           |
| S. Africa                   | SAF   | 14.69                      | 13.14                     | 14.45                    | 23.55                      | 36.18                      | 23.88               | 20.98            | 8.06                       | 38%                                           |
| N. Asia                     | NAS   | 3.13                       | 2.75                      | 5.22                     | 9.92                       | 7.64                       | 6.98                | 5.94             | 2.53                       | 43%                                           |
| W. Asia                     | WAS   | 0.87                       | 0.43                      | 2.76                     | 6.12                       | 3.53                       | 1.66                | 2.56             | 1.91                       | 75%                                           |
| C. Asia                     | CAS   | 0.71                       | 0.47                      | 2.68                     | 3.36                       | 4.50                       | 1.86                | 2.26             | 1.42                       | 63%                                           |
| Tibetan Plateau             | TIB   | 1.16                       | 1.12                      | 1.29                     | 3.06                       | 5.31                       | 1.83                | 2.30             | 1.51                       | 66%                                           |
| E. Asia                     | EAS   | 15.15                      | 16.79                     | 15.17                    | 19.85                      | 21.65                      | 17.50               | 17.69            | 2.38                       | 13%                                           |
| S. Asia                     | SAS   | 15.20                      | 14.84                     | 29.41                    | 23.55                      | 15.33                      | 17.82               | 19.36            | 5.40                       | 28%                                           |
| S.E. Asia                   | SEA   | 71.68                      | 87.83                     | 79.53                    | 14.69                      | 43.16                      | 64.78               | 60.28            | 24.67                      | 41%                                           |
| N. Australia                | NAU   | 9.71                       | 6.41                      | 12.95                    | 49.75                      | 20.86                      | 27.53               | 21.20            | 14.57                      | 69%                                           |
| S. Australia                | SAU   | 5.27                       | 5.18                      | 5.24                     | 5.55                       | 2.12                       | 4.39                | 4.63             | 1.18                       | 25%                                           |
| Global                      |       | 452                        | 462                       | 434                      | 482                        | 478                        | 510                 | 470              | 24                         | 5%                                            |

39 Note: The ensemble mean is calculated by averaging the isoprene emissions values from the *historical* simulation of CMIP6 models and VISIT-  
40 S3(G1997). For each region, inter-model spread is defined as the standard deviation of the values across these models. The relative inter-model  
41 spread is then calculated by dividing the standard deviation by the ensemble mean and multiplying by 100%, expressed as a percentage.

Table S5. Plant functional types (PFTs) estimated in CMIP6 models and VISIT(G1997)

| Abbreviation | CESM2-WACCM,<br>NorESM2-LM<br>(G2012) | GFDL-ESM4<br>(G2006)       | GISS-E2.1-G<br>(G1995)                 | UKESM1-0-LL<br>(P2011)                   | VISIT<br>(G1997)                              |
|--------------|---------------------------------------|----------------------------|----------------------------------------|------------------------------------------|-----------------------------------------------|
| NeDeBo       | Needleleaf deciduous boreal trees     | Needleleaf deciduous trees | Needleleaf deciduous trees             | Needleleaf deciduous trees               | Boreal deciduous forest                       |
| NeEvTe       | Needleleaf evergreen temperate trees  |                            |                                        |                                          | Temperate needleleaf evergreen forest         |
| NeEvBo       | Needleleaf evergreen boreal trees     | Needleleaf evergreen trees | Needleleaf evergreen trees             | Needleleaf evergreen trees               | Boreal evergreen forest                       |
| BrEvTr       | Broadleaf evergreen tropical trees    |                            |                                        | Broadleaf evergreen tropical trees       | Tropical evergreen forest                     |
| BrEvTe       | Broadleaf evergreen temperate trees   | Broadleaf evergreen trees  | Broadleaf evergreen trees              | Broadleaf evergreen temperate trees      | Temperate broadleaf evergreen forest          |
| BrDeTr       | Broadleaf deciduous tropical trees    |                            |                                        |                                          | Tropical deciduous forest                     |
| BrDeTe       | Broadleaf deciduous temperate trees   |                            | Cold/Drought broadleaf deciduous trees |                                          | Temperate deciduous forest                    |
| BrDeBo       | Broadleaf deciduous boreal trees      | Broadleaf deciduous trees  |                                        | Broadleaf deciduous trees                | Evergreen/Deciduous mixed forest <sup>a</sup> |
| EvTeSb       | Broadleaf evergreen temperate shrub   |                            |                                        | Evergreen shrub                          | Dense shrubland                               |
| DeTeSb       | Broadleaf deciduous temperate shrub   |                            |                                        |                                          | Open shrubland                                |
| DeBoSb       | Broadleaf deciduous boreal shrub      | Shrubs                     | Cold/Arid adapted shrubs               | Deciduous shrub                          | Tundra                                        |
| C4Gr         | Warm C4 grass                         |                            | C4 grass                               | C4 grass                                 | Desert/Savanna                                |
| C3Gr         | Cool C3 grass                         |                            | C3 grass                               | C3 grass                                 | Grassland/Steppe                              |
| ArcticC3Gr   | Arctic C3 grass                       | Grass and others           | Arctic C3 grass                        |                                          | Polar Desert/Rock/Ice                         |
| Crop         | Crops                                 | Crops                      | C3 crops                               | C3 crop, C3 pasture, C4 crop, C4 pasture | Crops                                         |

<sup>a</sup> temperate/boreal broadleaf and needleleaf trees

44

45

46

Table S6. Emission factors ( $\mu\text{gC g}_{\text{mass}}^{-1} \text{h}^{-1}$ ) for each of the plant functional types described in Table S5

| Abbreviation | CESM2-WACCM,<br>NorESM2-LM<br>(G2012) | GFDL-ESM4<br>(G2006) | GISS-E2.1-G<br>(G1995) | UKESM1-0-LL<br>(P2011) | VISIT<br>(G1997) |
|--------------|---------------------------------------|----------------------|------------------------|------------------------|------------------|
| NeDeBo       | 0.003                                 | 0.0                  | 8.0                    | 8.0                    | 8.0              |
| NeEvTe       | 1.2                                   | 2.0                  | 8.0                    | 8.0                    | 8.0              |
| NeEvBo       | 4.6                                   | 4.0                  |                        |                        | 8.0              |
| BrEvTr       | 20.6                                  |                      | 24.0                   | 24.0                   | 24.0             |
| BrEvTe       | 29.4                                  |                      |                        | 16.0                   | 16.0             |
| BrDeTr       | 33.3                                  |                      |                        |                        | 24.0             |
| BrDeTe       | 47.6                                  |                      |                        |                        | 45.0             |
| BrDeBo       | 52.4                                  | 24.0                 | 24.0/45.0              | 35.0                   | 8.0              |
| EvTeSb       | 5.6                                   |                      |                        | 20.0                   | 16.0             |
| DeTeSb       | 19.0                                  |                      |                        |                        | 24.0             |
| DeBoSb       | 19.0                                  | 24.0                 | 16.0/24.0              | 10.0                   | 16.0             |
| C4Gr         | 1.2                                   |                      | 24.0                   | 24.0                   | 24.0             |
| C3Gr         | 5.0                                   |                      | 16.0                   |                        | 16.0             |
| ArcticC3Gr   | 9.9                                   | 0.0                  | 16.0                   | 16.0                   | 16.0             |
| Crop         | 0.01                                  | 0.0                  | 5.0                    | 5.0                    | 5.0              |

48 *Note:*

49 EFs in CESM2-WACCM(G2012), NorESM2-LM(G2012) are given in units of mass of species per unit area of land surface  
50 per unit time (e.g.  $\mu\text{g}_{\text{isoprene}} \text{m}^{-2} \text{h}^{-1}$ ), as opposed to  $\mu\text{gC g}_{\text{mass}}^{-1} \text{h}^{-1}$  used in other models and are denoted hereafter as  $EF_{\text{area}}$ .  
51 Therefore, a conversion must be applied to make these values comparable to the EFs used by other models, which are denoted  
52 as  $EF_{\text{mass}}$  ( $\mu\text{gC g}_{\text{mass}}^{-1} \text{h}^{-1}$ ). To convert  $EF_{\text{area}}$  to  $EF_{\text{mass}}$ , we applied Eq. (1) of Weber et al. (2023) as shown below:

$$53 \quad EF_{\text{mass}} = EF_{\text{area}} \times \frac{1}{LAI_{\text{ref}}} \times \frac{1}{SLW} \times \frac{m_{\text{Carbon}}}{m_{\text{species}}} \times \frac{1}{\gamma_{\text{CE}}} \quad (\text{S1})$$

54  
55 In that equation,  $LAI_{\text{ref}}$  is the reference leaf area index used by G2012 scheme ( $5 \text{ m}_{\text{leaf}}^2 \text{ m}_{\text{surface}}^{-2}$ ),  $SLW$  is the specific leaf  
56 weight ( $\text{g}_{\text{mass}} \text{ m}_{\text{surface}}^{-2}$ ), the factor  $\frac{m_{\text{Carbon}}}{m_{\text{species}}}$  accounts for the fact that G2012 scheme considers the mass flux of a given species  
57 and other land models (e.g., P2011 and VISIT) use the mass flux of carbon, and  $\gamma_{\text{CE}}$  is the G2012 canopy environment  
58 coefficient (0.57).

59 As CLM5 land model is incorporated in CESM2-WACCM(G2012), NorESM2-LM(G2012), we use SLW dataset with the  
60 CLM5. SLW is inverse from specific leaf area (SLA;  $\text{gC m}_{\text{leaf}}^{-2}$ ) (Ali et al., 2016), and apply a scaling of 2 to convert the mass  
61 of carbon to foliar mass.

62 Emission factors for UKESM1-0-LL(P2011) are derived from Weber et al. (2023), while for G2006 they are derived from the  
63 technical description of CLM3 (Oleson et al., 2004). Emission factors in GISS-E2.1-G(G1995) are assigned from Guenther et  
64 al. (1995) for corresponding PFTs, while values for VISIT(G1997) were derived from Lathière et al. (2006).

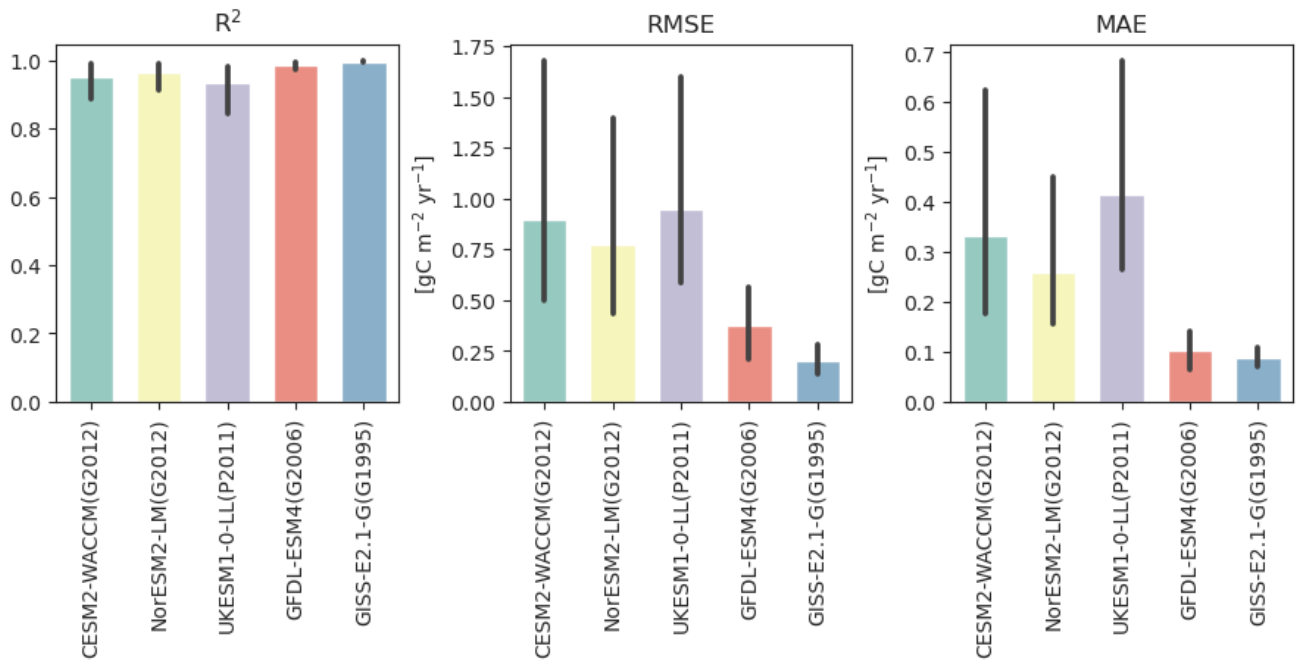

65

66

Figure S1. Three-fold cross-validation of random forest regressor applied for each CMIP6 model's data. R<sup>2</sup> is coefficient of determination, RMSE is Root Mean Squared Error, and MAE is Mean Absolute Error.

67

68

69

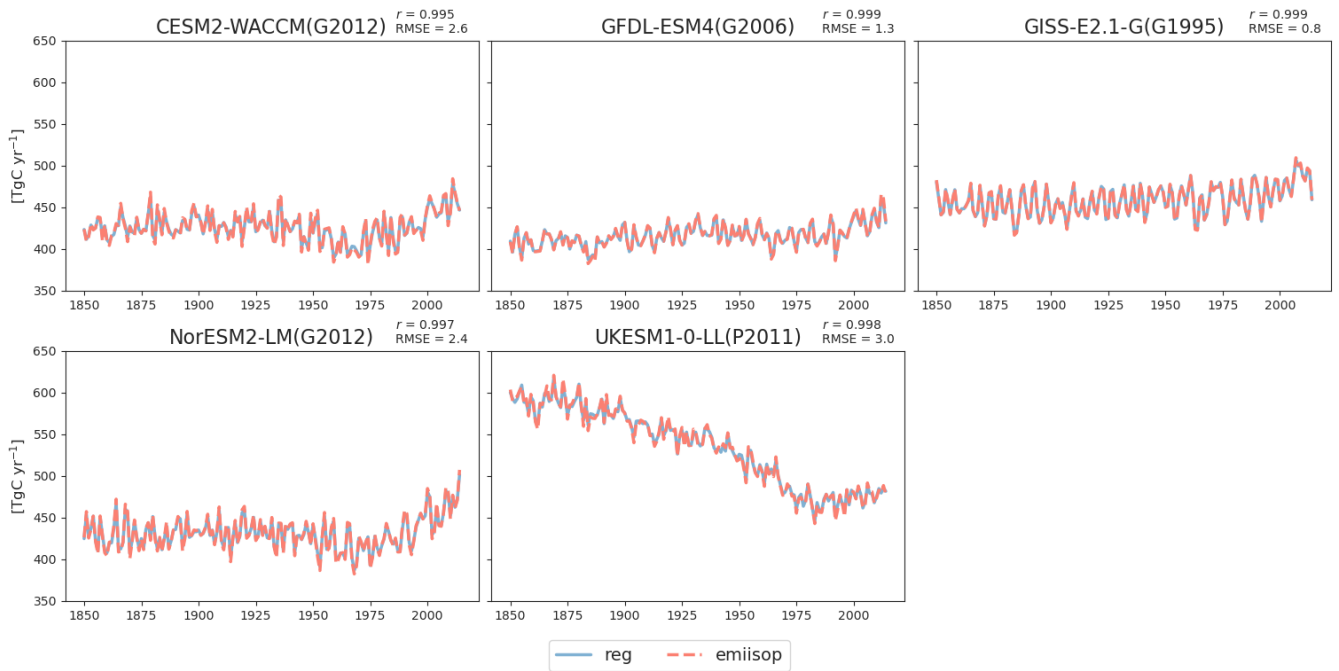

70

71

Figure S2. Global annual isoprene emission comparison between *historical* simulation from each CMIP6 model (*emiisop*) and estimation from its random forest regressor (*reg*). *r* is Pearson correlation and RMSE is Root Mean Square Error.

72

73

74

75

76



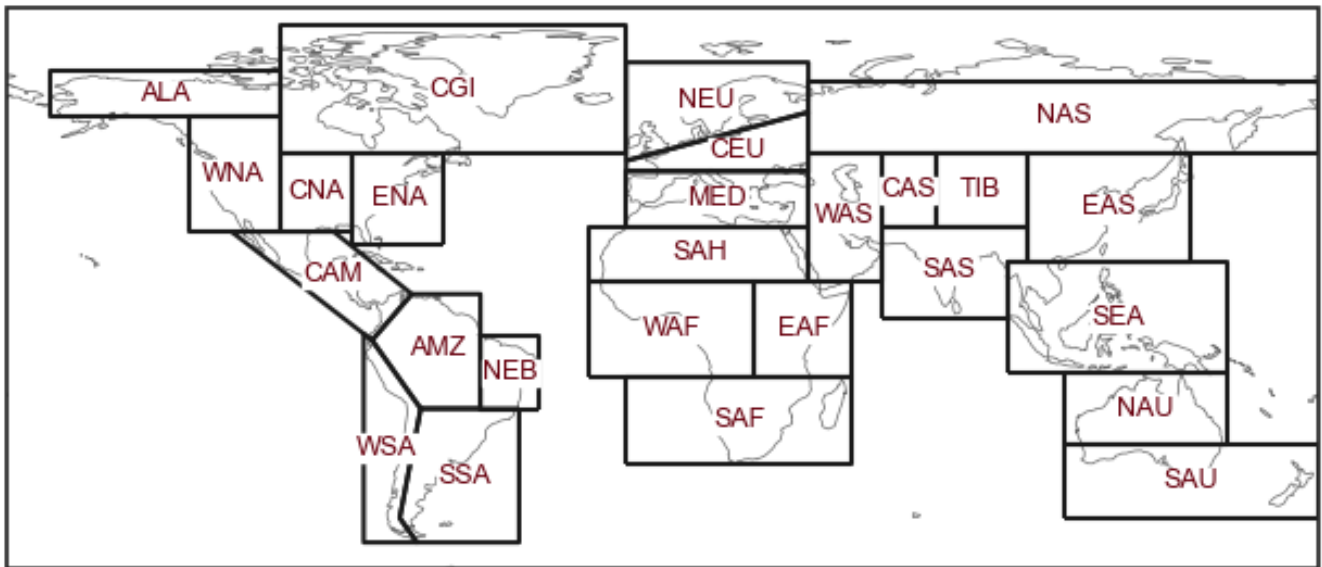

77

|                                       |                                        |                      |                                     |
|---------------------------------------|----------------------------------------|----------------------|-------------------------------------|
| ALA: Alaska/Northwest Canada          | NEB: North-East Brazil                 | WAF: Western Africa  | EAS: East Asia                      |
| CGI: Eastern Canada/Greenland/Iceland | WSA: West Coast South America          | EAF: Eastern Africa  | SAS: South Asia                     |
| WNA: Western North America            | SSA: South-eastern South America       | SAF: Southern Africa | SEA: Southeast Asia                 |
| CAN: Central North America            | NEU: Northern Europe                   | NAS: Northern Asia   | NAU: Northern Australia             |
| ENA: Eastern North America            | CEU: Central Europe                    | WAS: Western Asia    | SAU: Southern Australia/New Zealand |
| CAM: Central America/Mexico           | MED: Southern Europe/the Mediterranean | CAS: Central Asia    |                                     |
| AMZ: Amazon                           | SAH: Sahara                            | TIB: Tibetan Plateau |                                     |

78

79

80

**Figure S3. The 26 SREX regions are defined by the IPCC Special Report on Managing the Risks of Extreme Events and Disasters to Advance Climate Change Adaptation (Seneviratne et al., 2012).**

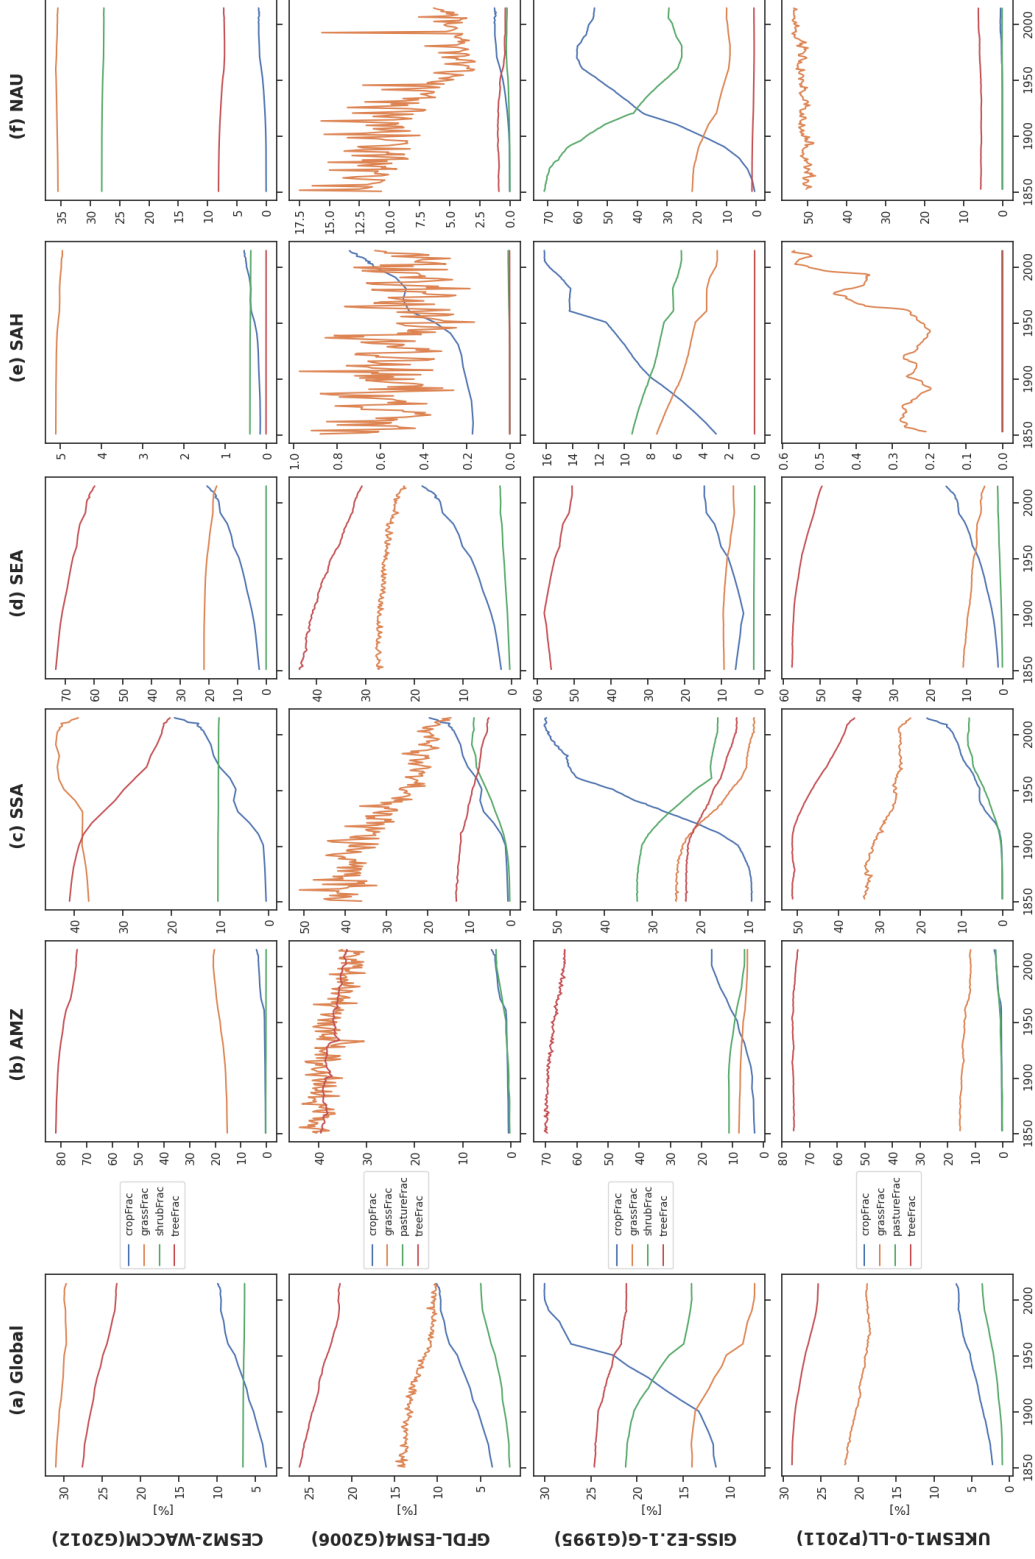

81

82 **Figure S4.** Annual fraction (%) of four plant functional types (PFTs): tree, grass, shrub/pasture, and crop during 1850–2014. Panels (a–f) show changes at (a) the global scale and in regions: (b)  
 83 Amazon (AMZ), (c) Southeastern South America (SSA), (d) Southeast Asia (SEA), (e) Sahara (SAH), and (f) North Australia (NAU). Data from CESM2-WACCM(G2012), GFDL-ESM4(G2006),  
 84 GISS-E2.1-G(G1995), and UKESM1-0-LL(P2011). NorESM2-LM(G2012) uses the same land component as CESM2-WACCM(G2012).

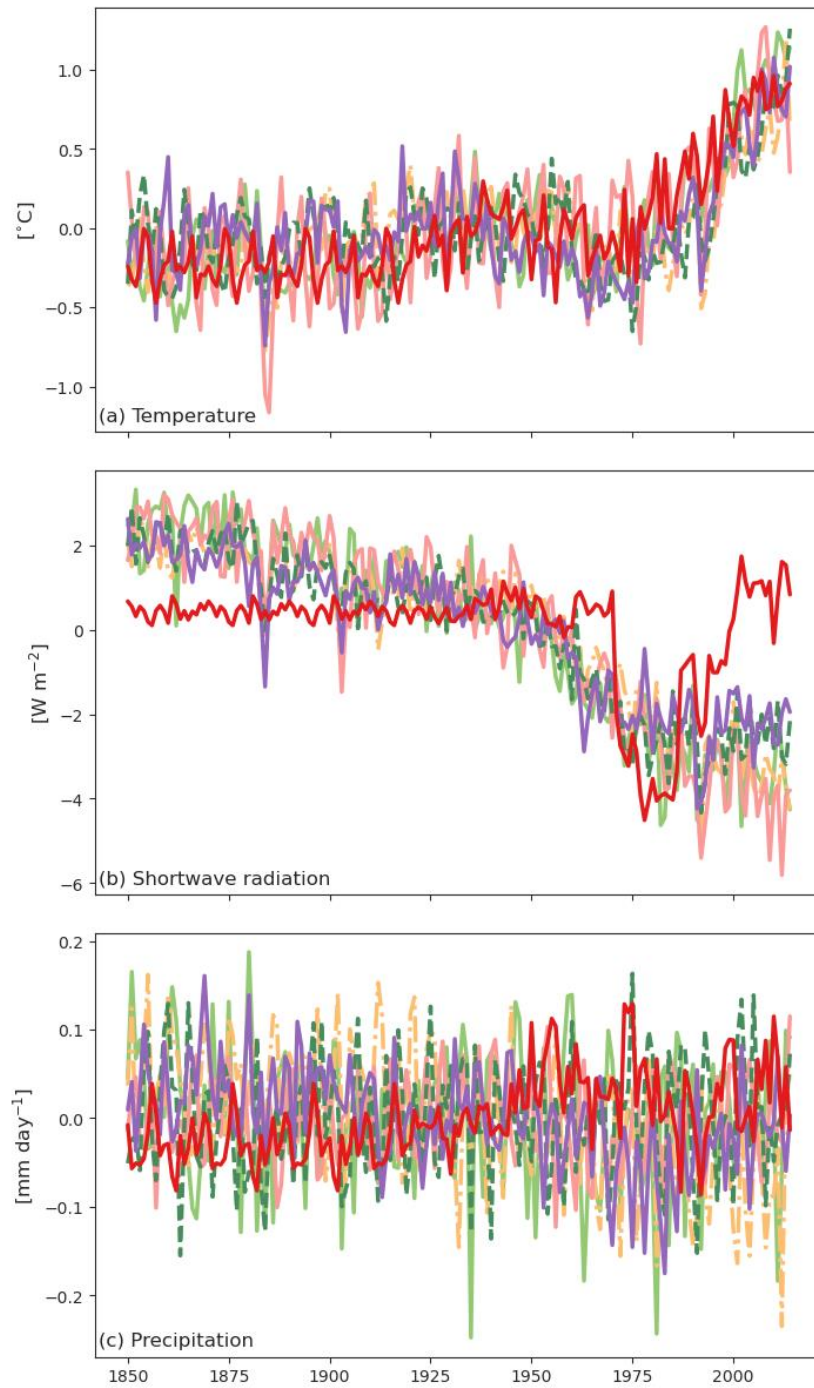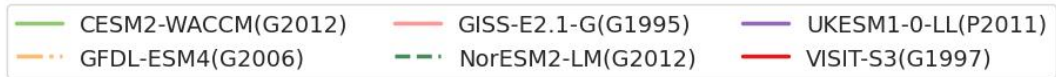

85  
86  
87

**Figure S5. Global annual anomalies of (a) temperature; (b) shortwave radiation and (c) precipitation in CMIP6 models and VISIT-S3 during 1850–2014. Anomalies are deviation from baseline (1850–2014 average).**

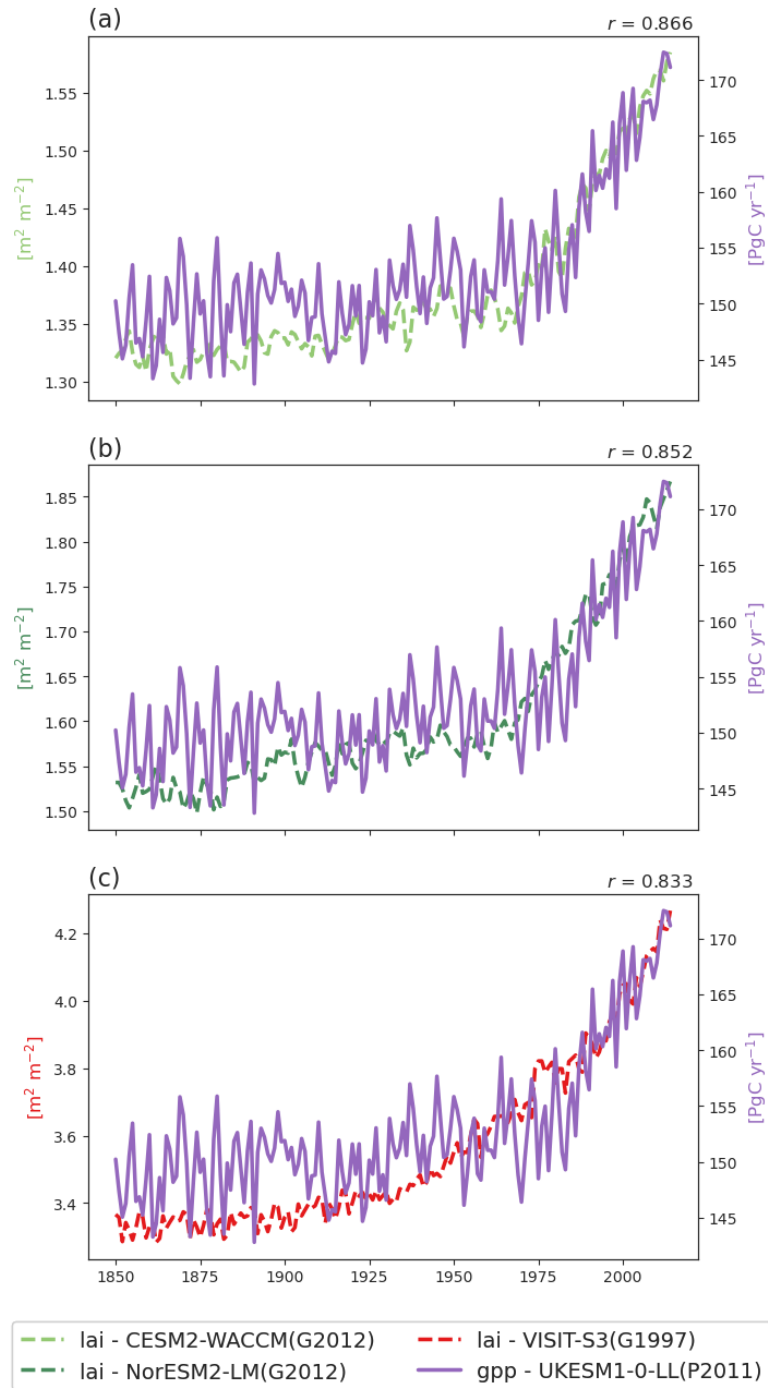

88

89 **Figure S6. Global annual GPP of UKESM1-0-LL(P2011) and LAI of: (a) CESM2-WACM(G2012), (b) NorESM2-LM(G2012), (c)**  
 90 **VISIT-S3(G1997) over land areas during 1850–2014.  $r$  is Pearson correlation.**

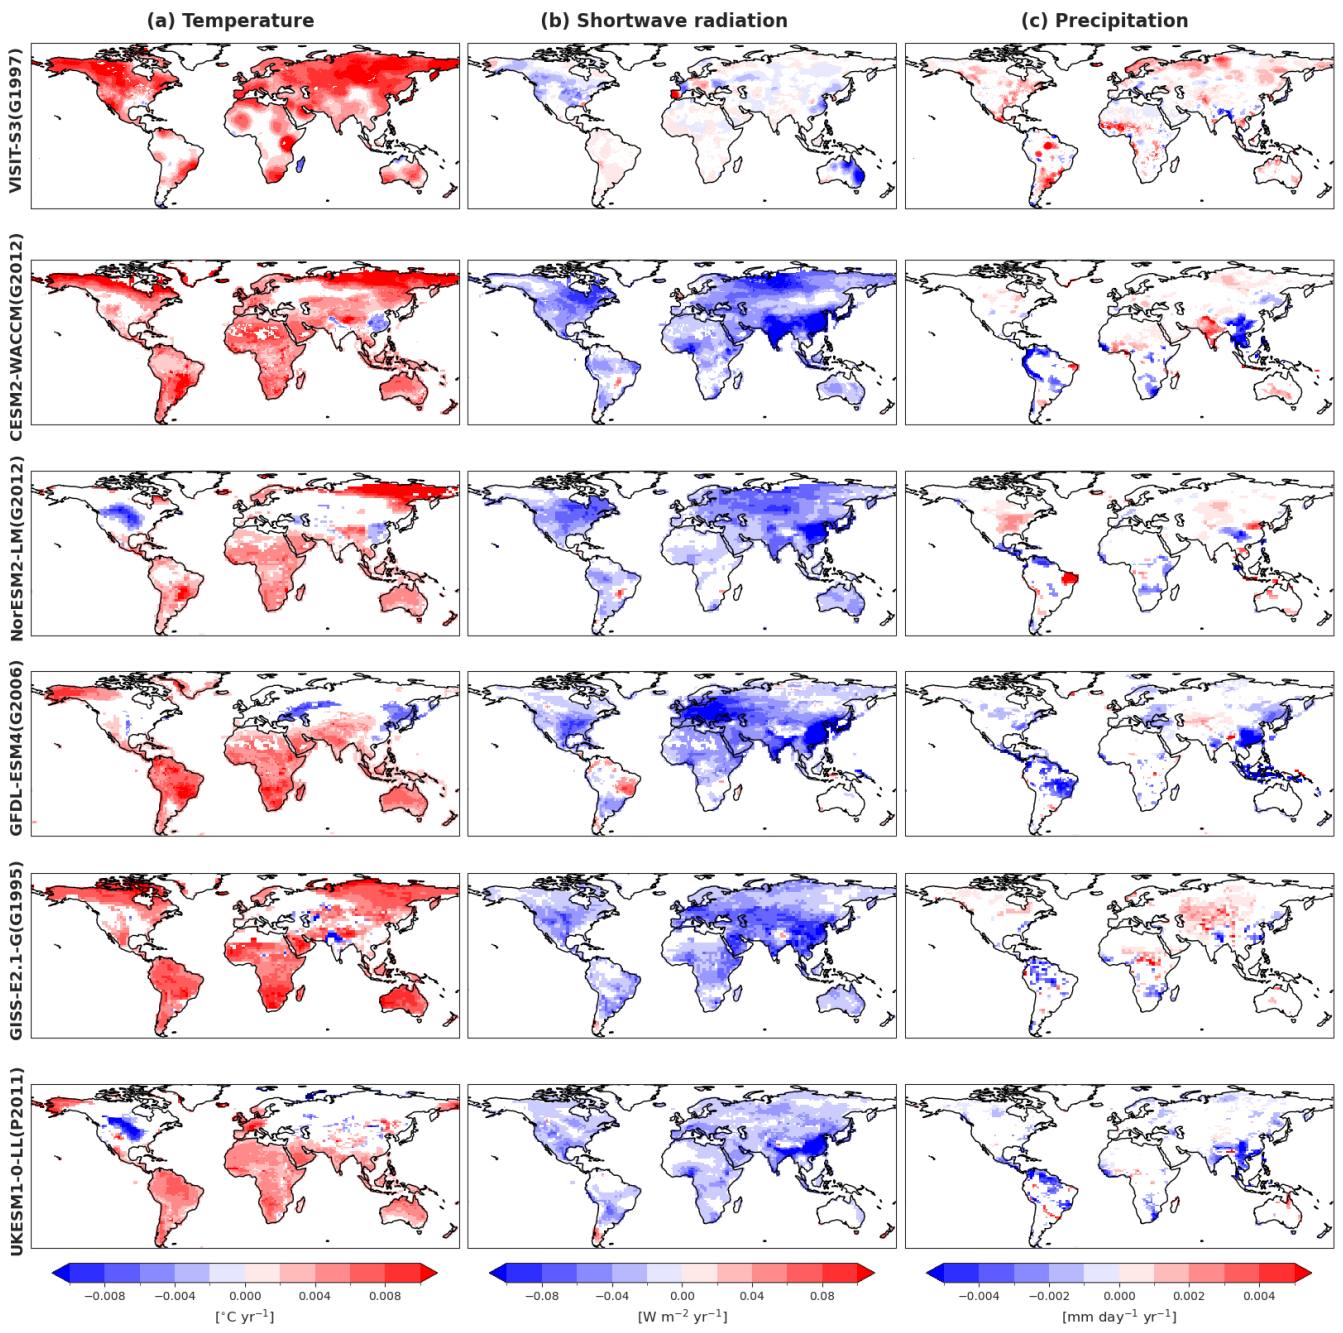

91

92

93

Figure S7. Spatial distribution of annual trends in (a) temperature, (b) shortwave radiation, and (c) precipitation over land areas during 1850–2014. Only significant trends (with  $p < 0.05$ ) are presented.

94

95

96

97

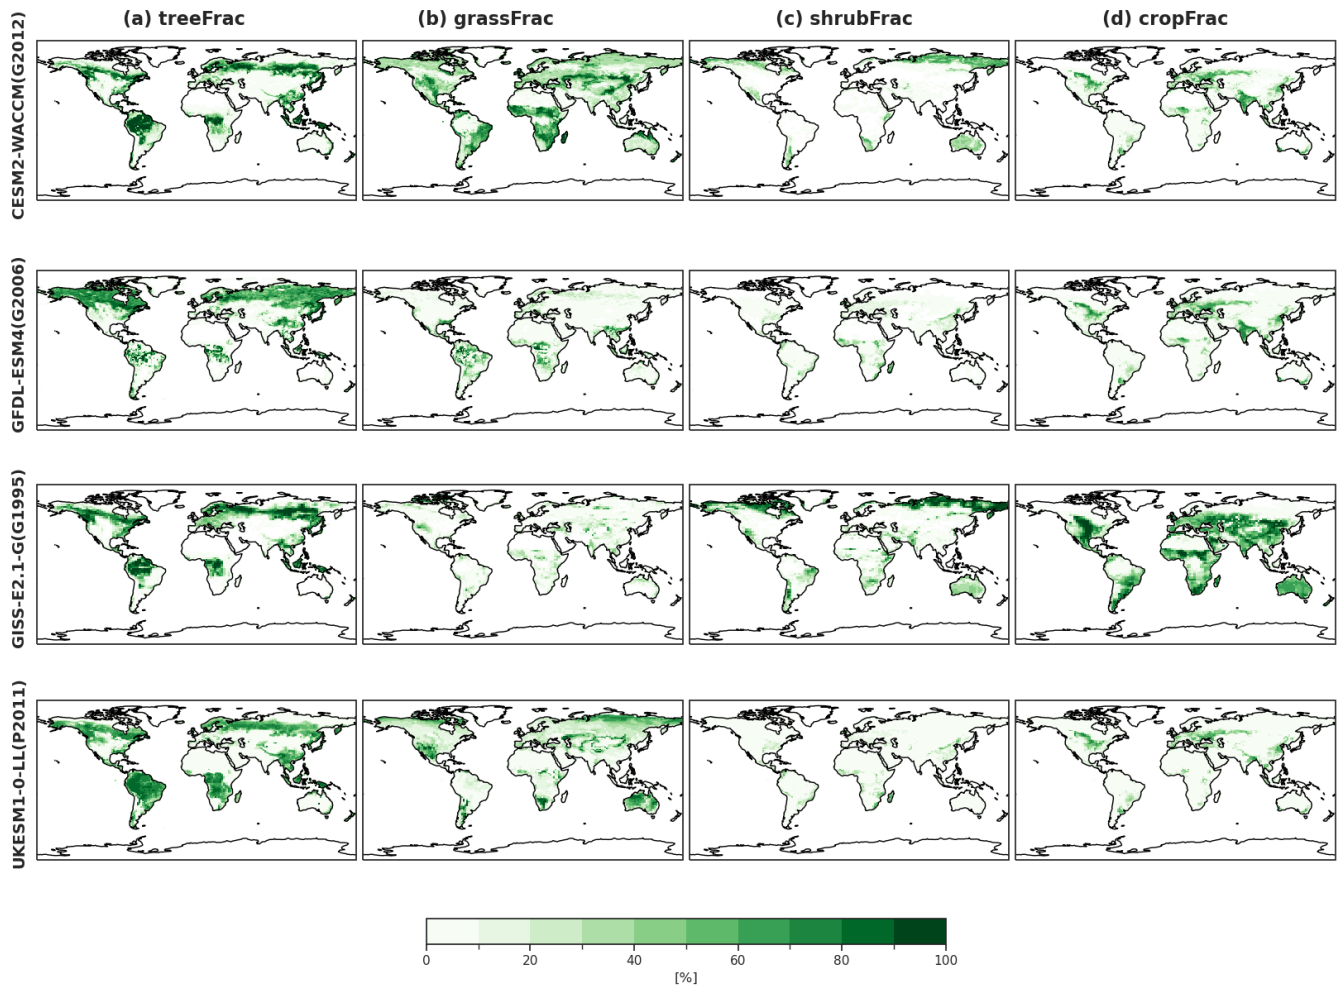

99

100 **Figure S8. Mean annual fraction (%) in the present day (2000–2014) of four plant functional types (PFTs): (a) tree, (b) grass, (c)**  
 101 **shrub, and (d) crop. Data from CESM2-WACCM(G2012), GFDL-ESM4(G2006), GISS-E2.1-G(G1995), and UKESM1-0-**  
 102 **LL(P2011). NorESM2-LM(G2012) uses the same land component as CESM2-WACCM (G2012).**

103

104

105

106
